# Supplementary material for: Acinetobacter baumannii Outer Membrane Protein A Induces Pulmonary Epithelial Barrier Dysfunction and Bacterial Translocation Through The TLR2/IQGAP1 Axis
Source: Front Immunol. 2022 Jun 30;13:927955. doi: 10.3389/fimmu.2022.927955 (PMC9280087; doi:10.3389/fimmu.2022.927955)
Supplement: Supplementary file 1 [file DataSheet_1.docx]

***Acinetobacter baumannii*** **outer membrane protein A induces****pulmonary** **epithelial barrier dysfunction and** **bacterial translocation through the TLR2/IQGAP1 axis**

Wang Zhang a, b, c, 1, Hua Zhou d, 1, Yan Jiang a, b, c, 1, Jintao He a, b, c, Yue Yao a, b, c, Jianfeng Wang e, Xiaochen Liu a, b, c, Sebastian Leptihna, f, g, Xiaoting Hua a, b, c, *, Yun song Yu a, b, c, *

a Department of Infectious Diseases, Sir Run Run Shaw Hospital, Zhejiang University School of Medicine, Hangzhou, Zhejiang, P.R. China.

b Regional Medical Center for National Institute of Respiratory Diseases, Sir Run Run Shaw Hospital, Zhejiang University School of Medicine, Hangzhou, China

c Key Laboratory of Microbial Technology and Bioinformatics of Zhejiang Province, Hangzhou, P.R. China.

d Department of Respiratory and Critical Care Medicine, The First Affiliated Hospital, Zhejiang University School of Medicine, Hangzhou, Zhejiang, P.R. China.

e Department of Respiratory and Critical Care Medicine, Zhejiang Provincial Hospital of Chinese Medicine, Hangzhou, Zhejiang, P.R. China.

f Zhejiang University-University of Edinburgh Institute, Zhejiang University, Haining, P.R. China.

g University of Edinburgh Medical School, Biomedical Sciences, College of Medicine & Veterinary Medicine, The University of Edinburgh, Edinburgh, UK

1These authors contributed equally to this work.

*Corresponding Author

Yunsong Yu

Department of Infectious Diseases,

Sir Run Run Shaw Hospital, Zhejiang University School of Medicine

3 East Qingchun Road

Hangzhou, Zhejiang, 310016, P.R. China.

Email: yvys119@zju.edu.cn

Xaioting Hua

Department of Infectious Diseases,

Sir Run Run Shaw Hospital, Zhejiang University School of Medicine

3 East Qingchun Road

Hangzhou, Zhejiang, 310016, P.R. China.

Email: xiaotinghua@zju.edu.cn

**Supplementary methods**

**Immunohistochemical staining**

All samples were rinsed in ice-cooled Ringer solution. Mouse lung samples were cut and trimmed to squares and pinned on cork pieces. The tissues were fixed in 4% paraformaldehyde and rinsed in PBS, dehydrated in a graded series of ethanol, embedded in paraffin, cut to 5 µm thin sections, mounted on slides, dewaxed in xylene and rehydrated in a decreasing series of ethanol. Rinsing of the rehydrated sections in 0.01M citrate buffer, pH 6.0. Heat induced epitope retrieval (0.01M citrate buffer, pH 6.0, 96°C, 25s), cooling down of the section container 15s at room temperature and 5s in cold tap water. Rinsing of the sections for 2s, surrounding of sections with a hydrophobic barrier using a barrier pen. Rinsing of the sections in TBS (0.05M Tris-HCl pH 7.6 + 0.9% NaCl). Treated with peroxidase and rinsing in TBS. Preincubated in 3% BSA + 5% normal goat serum in TBS. Incubated in primary antibody overnight at 4°C. Rinsing in TBS, and incubated in HRP labelled goat-anti-rabbit-antibody in the dark. Rinsing in TBS and used DAB for HRP detection. Dehydrated by 100% ethanol and Xylene. Finally added mounting medium and coverslip

**Cell viability assay**

A549 cells were grown in 96-well plates at a density of 10000 cells/well. Once the cells had adhered, different A*cinetobacter baumannii*, C29 or JSH-23 was added to each well and treated for 6h. A Cell Counting Kit-8 (CCK-8; Dojindo, Tokyo, Japan) solution (10 μl) and FBS free medium without P/S (100μl) was then added to each well and incubated for 2hours. Absorbance was then determined at 450nm using a micro-plate reader (Spectra Maxi3x; Molecular Device, CA, USA). We repeated the experiments three times for each group and averaged the results.

**Supplementary Tables**

| **TableS1. Strains used in this Study** |  |  |
| --- | --- | --- |
| Strains | Source | Catalog No |
| *A. baumannii* ATCC17978 | ATCC | #17978 |
| *A. baumannii* ATCC19606 | ATCC | #19606 |
| *A. baumannii* ATCC17978ΔompA | This Study | N/A |
| *A. baumannii* ATCC19606ΔompA | This Study | N/A |
| *E. coli* BL21(DE3) Competent Cells | Vazyme | C504-02 |

| **TableS2. Plasmids used in this Study** | |  |  |
| --- | --- | --- | --- |
| Plasmids | Source | Resistance gene | Catalog No |
| pCMV-Flag-N | Clontech | ampicillin | 635688 |
| p-EGFP-N | Clontech | kanamycin | 6086-1 |
| pYMAb2 | This study | hygromycin | N/A |
| pET28a | Novagen | kanamycin | 69258 |
| pCMV-Flag-ompA | This study | ampicillin | N/A |
| pCMV-ompA | This study | ampicillin | N/A |
| p-EGFP-TLR2 | This study | kanamycin | N/A |
| pYMAb2-ompA | This study | hygromycin | N/A |
| pET28a-ompA | This study | kanamycin | N/A |

| **TableS3. Antibodies used in this Study** | | | | |
| --- | --- | --- | --- | --- |
| Antibodies | Source | | Application | Dilution |
| E‐Cadherin Rabbit antibody | #3195 | Cell Signal Technology | IF/IHC | 1:200 |
|  |  |  | WB | 1:1000 |
| NF-κB Mouse antibody | #6956 | Cell Signal Technology | IF | 1:800 |
| NF-κB Rabbit antibody | #8242 | Cell Signal Technology | WB | 1:1000 |
| IQGAP1 Rabbit antibody | #20648 | Cell Signal Technology | IF | 1:100 |
|  |  |  | WB | 1:1000 |
| β-catenin Rabbit antibody | #8480 | Cell Signal Technology | IP | 1：50 |
|  |  |  | WB | 1:1000 |
| α-catenin Rabbit antibody | #3240 | Cell Signal Technology | IP | 1：50 |
|  |  |  | WB | 1:1000 |
| DYKDDDDK Tag (Flag) Rabbit antibody | #14793 | Cell Signal Technology | IF | 1:100 |
|  |  |  | IP | 1:50 |
|  |  |  | WB | 1:1000 |
| GFP Tag Rabbit Antibody | 50430-2-AP | Proteintech | IF | 1:100 |
|  |  |  | WB | 1:1000 |
| GFP Tag Mouse Antibody | 66002-1-Ig | Proteintech | IF | 1:100 |
|  |  |  | WB | 1:2000 |
| Toll like receptor 2 Rabbit antibody | #12276 | Cell Signal Technology | WB | 1:1000 |
| GAPDH Rabbit Antibody | #5174 | Cell Signal Technology | WB | 1:1000 |
| LaminA/C Rabbit Antibody | #2032 | Cell Signal Technology | WB | 1:1000 |
| *A. baumannii* GnaA Rabbit antibody |  | Huabio | IF | 1:100 |
| CoraLite488-conjugated Goat Anti-Rabbit IgG(H+L) | SA00013‐2 | Proteintech | IF | 1:200 |
| CoraLite594-conjugated Affinipure Goat Anti-Rabbit IgG(H+L) | SA00013‐4 | Proteintech | IF | 1:200 |
| CoraLite594-conjugated Affinipure Goat Anti-Mouse IgG(H+L) | SA00013‐3 | Proteintech | IF | 1:200 |
| HRP-conjugated Goat Anti-Rabbit IgG(H+L) | SA00001-2 | Proteintech | WB | 1:2000 |

| **TableS4. Primers used in this Study** | | | |
| --- | --- | --- | --- |
| Gene | Application |  | Sequence |
| ATCC 17978 ompA | Full length | F: | ATGAAATTGAGTCGTATTGCAC |
|  |  | R: | CATAAAAAAGCGACTCTAACGAGTC |
| Toll like receptor 2 | Full length | F: | ATGCCACATACTTTGTGGATGG |
|  |  | R: | CTAGGACTTTATCGCAGCTCTC |
| IL-6 | qPCR | F: | ACTCACCTCTTCAGAACGAATTG |
|  |  | R: | CCATCTTTGGAAGGTTCAGGTTG |
| TNF-α | qPCR | F: | CCTCTCTCTAATCAGCCCTCTG |
|  |  | R: | GAGGACCTGGGAGTAGATGAG |
| IL-1β | qPCR | F: | ATGATGGCTTATTACAGTGGCAA |
|  |  | R: | GTCGGAGATTCGTAGCTGGA |
| IL-8 | qPCR | F: | ACTGAGAGTGATTGAGAGTGGAC |
|  |  | R: | AACCCTCTGCACCCAGTTTTC |
| GAPDH | qPCR | F: | GGAGCGAGATCCCTCCAAAAT |
|  |  | R: | GGCTGTTGTCATACTTCTCATGG |
| E-Cadherin | qPCR | F: | ATTTTTCCCTCGACACCCGAT |
|  |  | R: | TCCCAGGCGTAGACCAAGA |
| IQGAP1 | qPCR | F: | AGAACGTGGCTTATGAGTACCT |
|  |  | R: | CCAGTCGCCTTGTATCTGGT |

**References**

1. Li Y, Zhu Y, Zhou W, Chen Z, Moran RA, Ke H*, et al.* Alcaligenes faecalis metallo-β-lactamase in extensively drug-resistant Pseudomonas aeruginosa isolates. *Clin Microbiol Infect* 2021.

2. Chamberlain N, Korwin-Mihavics BR, Nakada EM, Bruno SR, Heppner DE, Chapman DG*, et al.* Lung epithelial protein disulfide isomerase A3 (PDIA3) plays an important role in influenza infection, inflammation, and airway mechanics. *Redox biology* 2019, **22:** 101129.

3. Moitra J, Sammani S, Garcia JG. Re-evaluation of Evans Blue dye as a marker of albumin clearance in murine models of acute lung injury. *Transl Res* 2007, **150**(4)**:** 253-265.

**Supplementary Figure legends**

**FigureS1.** (**A**) Translocation of *A. baumannii* ATCC17978 at multiple time points. (**B**) Translocation of WT and corresponding Δ*ompA* deletion strains across the A549 cell barrier at 6 h after infection. (**C**) The *ompA*-complemented strains (Δ*ompA ompA*+) showed restoration of translocation in the A549 cell monolayer and intrapulmonary burden in mice at 48 h after challenge (*n* = 3 per group). Red fluorescence represents the *A. baumannii* and blue fluorescence represents the nuclei, scale bar, 50μm. (**D**) The effects of different *A. baumannii* strains on A549 cell viability (CCK8 assay). (**E**) Evans blue dye (EB) permeability through the pulmonary epithelium of uninfected (Sham), Δ*ompA* (17978Δ*ompA*+pYMAb2) and Δ*ompA ompA*+ complemented strain-infected C57BL/6J mice measured in bronchial alveolar lavage fluid (BALF) (*n* = 3 per group). **(F)** EB-conjugated albumin (EBA, final concentration: 0.67 mg/mL) flux after infection with Δ*ompA* and Δ*ompA ompA*+ complemented strains (MOI=50). **(G)** TEER of A549 cell monolayers at multiple time points after treatment with Δ*ompA* and Δ*ompA* *ompA*+ complemented strains. (**H-K**) ELISA of IL-6 and TNF-α in mouse (*n* = 5 per group) BALF (**H and I**) and serum (**J and K**) at 48h after challenge with Δ*ompA* and Δ*ompA ompA*+ complemented strains. (**Land M**) The effects of different concentrations of C29 (**L**) and JSH-23(**M**) on A549 cell viability (CCK8 assay). (**N**) IL-1β, IL-6, IL-8, and TNF-α mRNA levels in A549 cells at 6 h after infection with different *A. baumannii* strains. Data are from three independent experiments; error bars represent standard deviation, ***P*<0.01,**P*<0.05 vs. Control (or NC, blank) group, ##*P*<0.01, #*P*<0.05.

**FigureS2.** (**A**) A549 cell migration ability after 17978WT and 19606WT time-dependent infection was detected by using wound healing assay. (**B**) Quantification of confluence rate of A549 cells at 24 hours after infection which represent the migration ability [% wound confluence = (a − b) × 100%/a; a = Initial scratch wound area at 0 h, b = Scratch wound area at 24 h], scale bar, 200μm. (**C and D**) Localisation of E-cadherin of HBE cells infected with different *A. baumannii* strains and A549 cells transfected with pCMV-*ompA* expression plasmid was evaluated by immunofluorescence labelling. Green represents E‐cadherin and blue indicates nuclei. Scale bar: 20μm. (**E and F**) Localisation of IQGAP1 of HBE cells infected with different *A. baumannii* strains and A549 cells transfected with pCMV-*ompA* expression plasmid was evaluated by immunofluorescence labelling. Green represents IQGAP1 and blue indicates nuclei. Scale bar: 20μm. (**G**) Expression of the IQGAP1 of A549 cells transfected with pCMV-*ompA* plasmid was evaluated by western blot, IQGAP1 protein levels are expressed relative to GAPDH. (**H and I**) IQGAP1 siRNA knockdown efficiency (mRNA level and protein level) was evaluated by quantitative real-time PCR (qRT-PCR) and western blot. (**J**) Rabbit IgG was used as a negative control for co-IP assay. ***P*<0.01 vs. Control (or NC, blank) group, ##*P*<0.01.

**FigureS3** (**A**) The cellular localization of E-cadherin in the lung tissue of mice challenged by intratracheal injection of different *A. baumannii* strains. (n = 3 per group), scale bar, 200μm (100X), 50μm (400X). (**B**) E-cadherin cleavage fragments (arrows) detected by the western blot at 6 h after infection with different *A. baumannii* strains and inhibitor C29, cleavage fragments levels are expressed relative to full length protein (135KD). (**C**) The effects of NC siRNA on migration ability of A549 cells infected with different *A. baumannii* strains, scale bar, 200μm. (**D and E**). The growth curves of 17978WT/ △*ompA* and 19606WT /△*ompA* within 6 h in FBS free-DMEM medium and at the starting concentration of 5*107 CFU/mL. (**F and G**) AUC of growth curve. (**H**) The purity of the recombinant OmpA was detected by using SDS-PAGE and Coomassie blue staining. (**I**) The mRNA expression level of inflammatory factors (IL-6, IL-8, TNF-α) under different concentrations of BSA (2.5μg/mL, 5μg/mL, 10μg/mL) treatment. (**J**) Cell migration ability under different concentrations of BSA treatment.
